# Supplementary material for: Greener design and characterization of biochar/Fe3O4@SiO2–Ag magnetic nanocomposite as efficient catalyst for synthesis of bioactive benzylpyrazolyl coumarin derivatives
Source: Royal Society of Chemistry journal article supplement (doi:10.1039/d3ra00869j), 2023-01-01

## Supporting Information

Greener design and characterization of biochar/Fe<sub>3</sub>O<sub>4</sub>@SiO<sub>2</sub>-Ag magnetic nanocomposite as efficient catalyst for synthesis of bioactive benzylpyrazolyl coumarin derivatives

Dharmendra Dharmendra, Priyanka Chundawat, Yogeshwari Vyas, Purnima Chaubisa, and Chetna Ameta\*

Department of Chemistry, Mohanlal Sukhadia University, Udaipur (Rajasthan)  
India

### Compound 5a

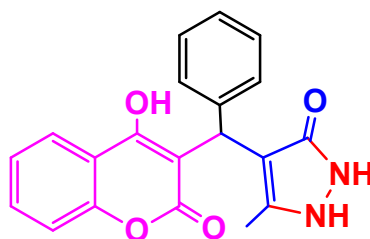

### FT-IR of Compound 5a

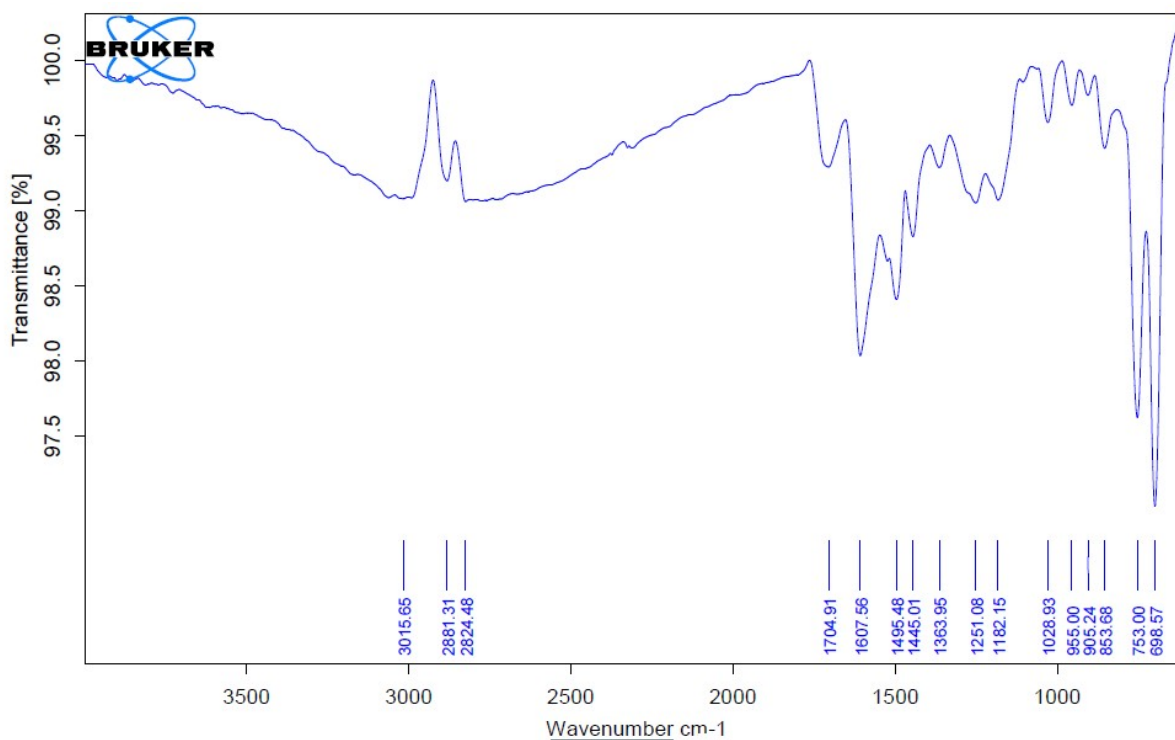

### 1H NMR of Compound 5a

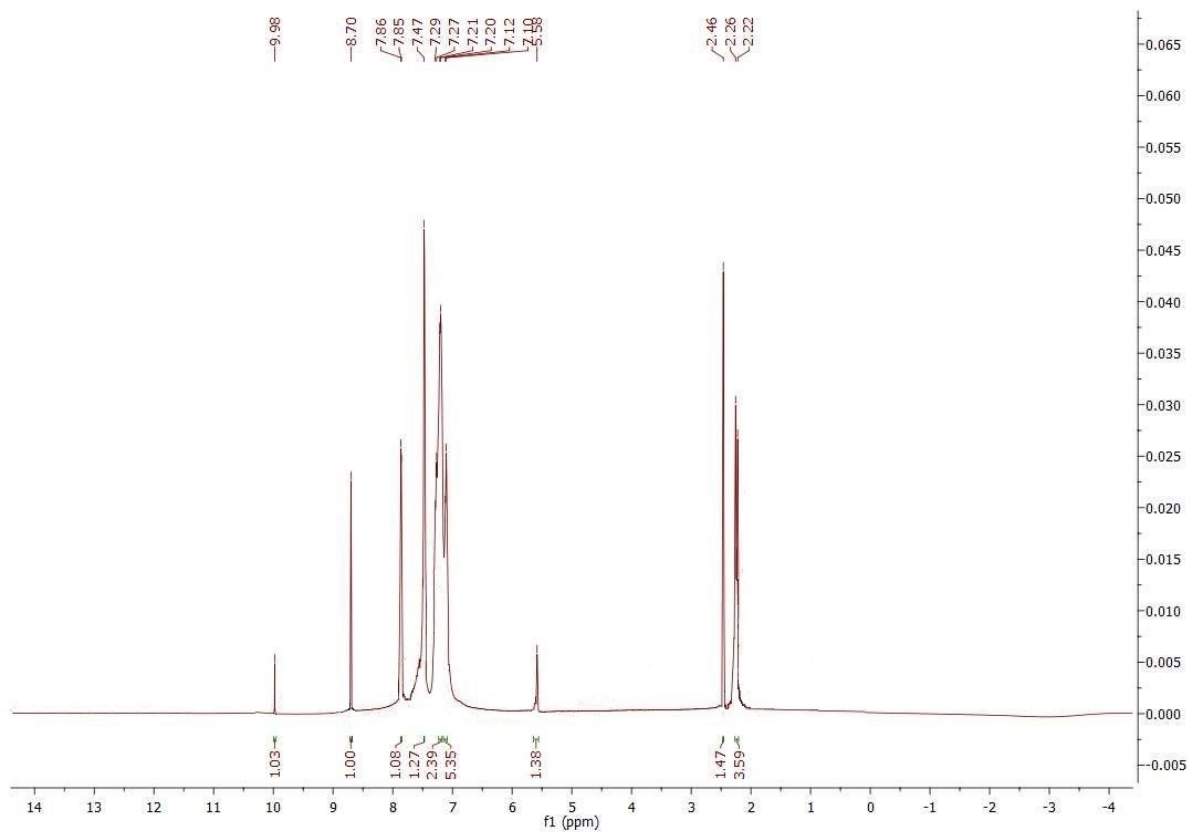

### 13C NMR of Compound 5a

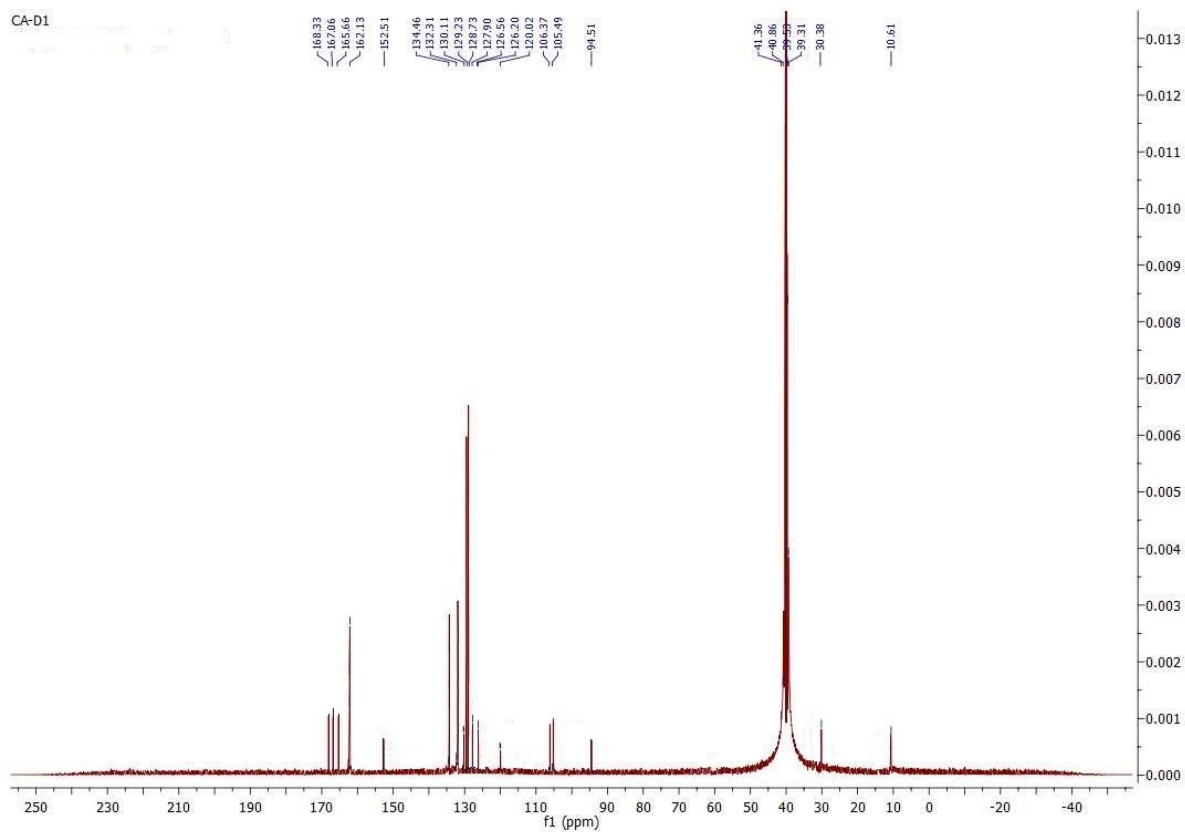

# ESI-MS of Compound 5a

WATERS,Q-TOF MICROMASS (ESI-MS)

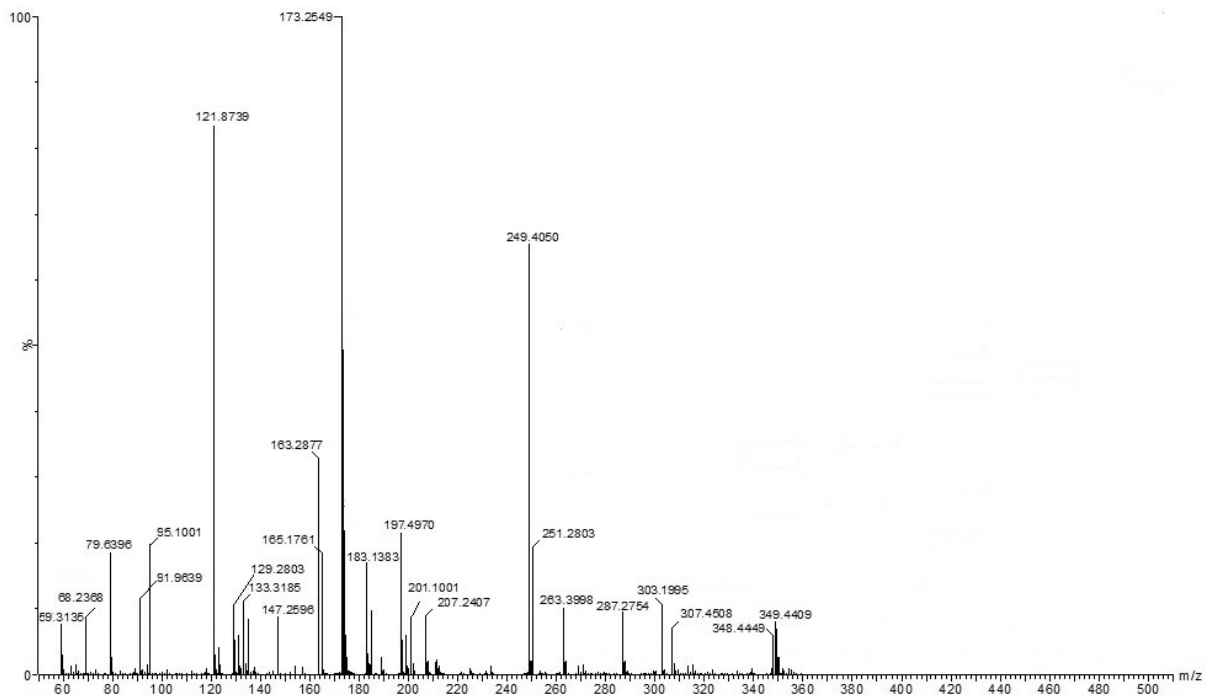

## COMPOUND 5b

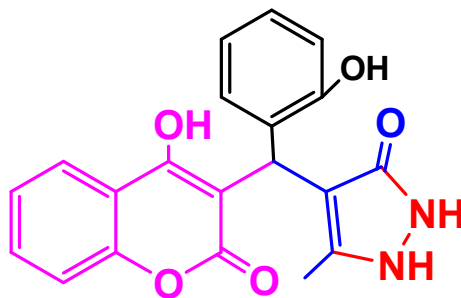

### FT-IR of Compound 5b

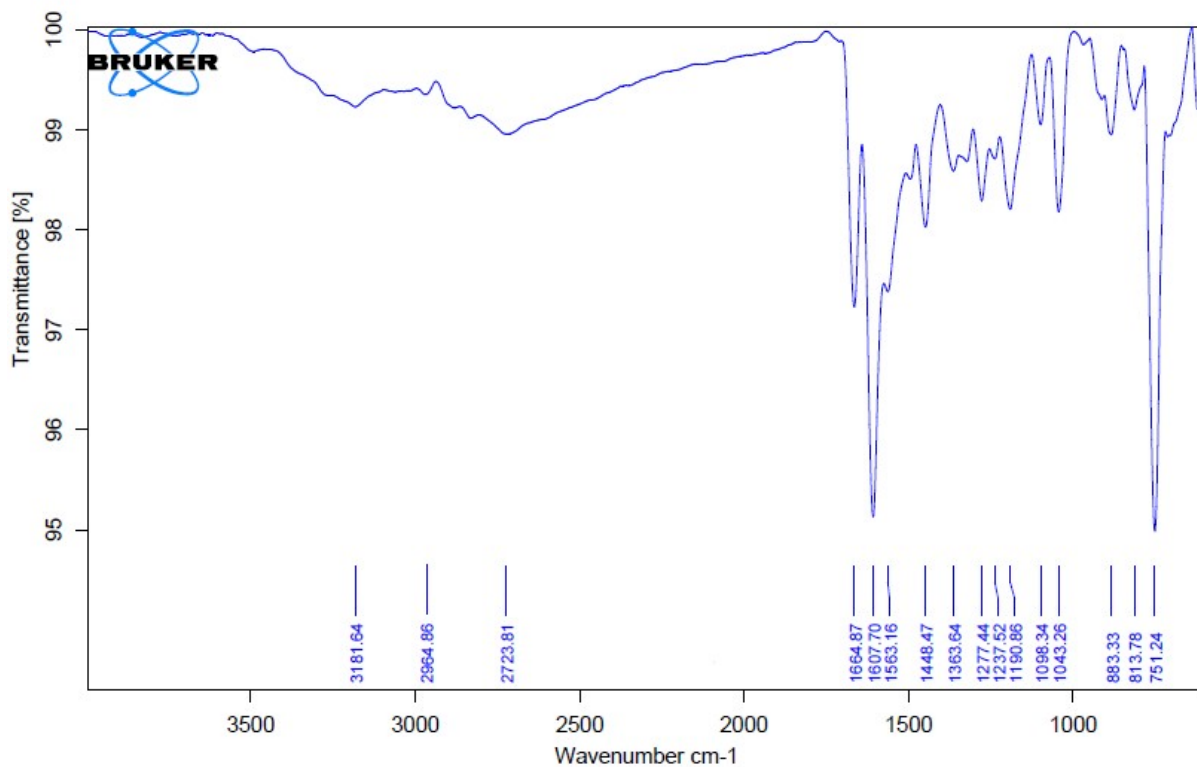

### <sup>1</sup>H NMR of Compound 5b

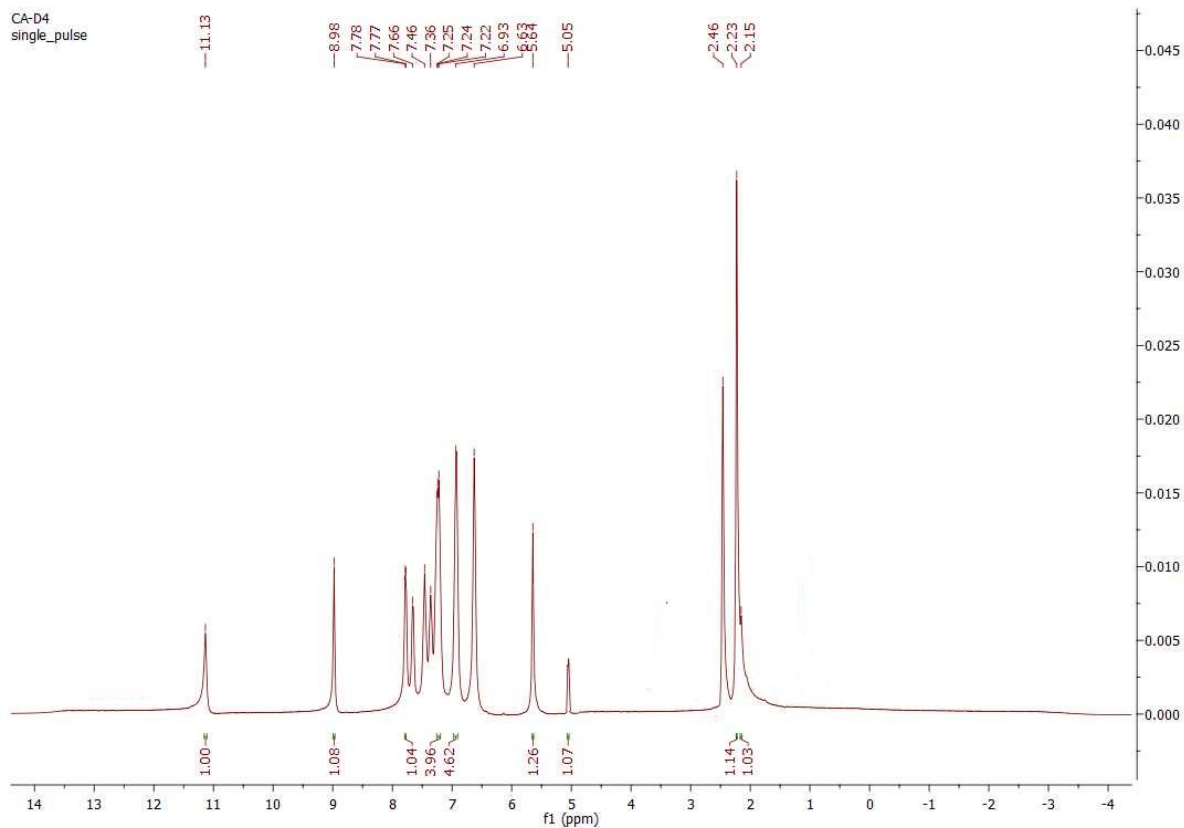

## **<sup>13</sup>C NMR of Compound 5b**

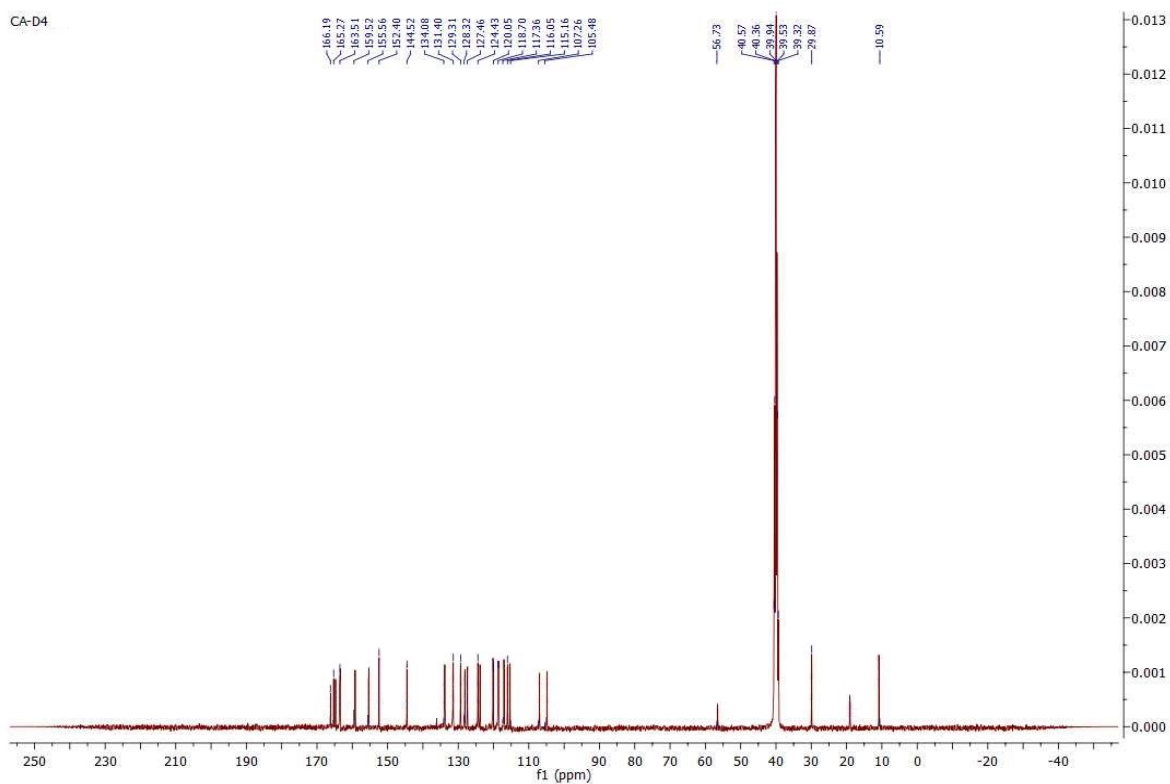

## **ESI-MS of Compound 5b**

WATERS,Q-TOF MICROMASS (ESI-MS)

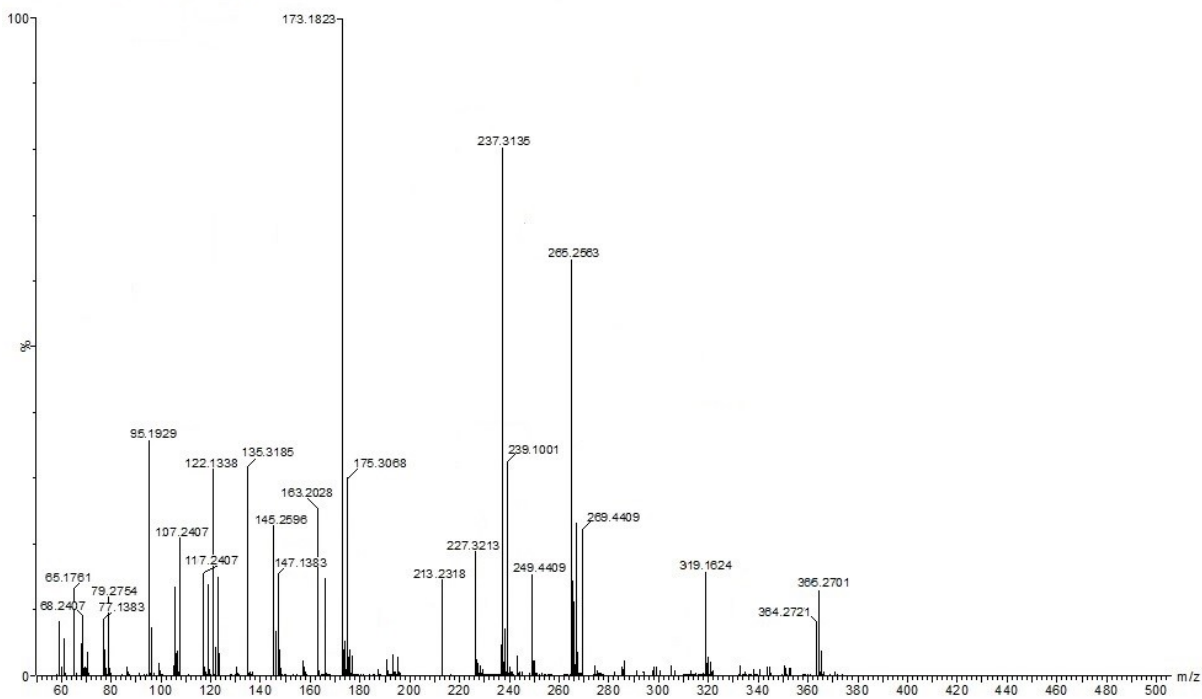

# COMPOUND 5c

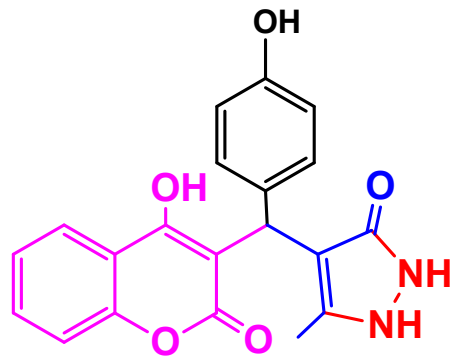

## FT-IR of compound 5c

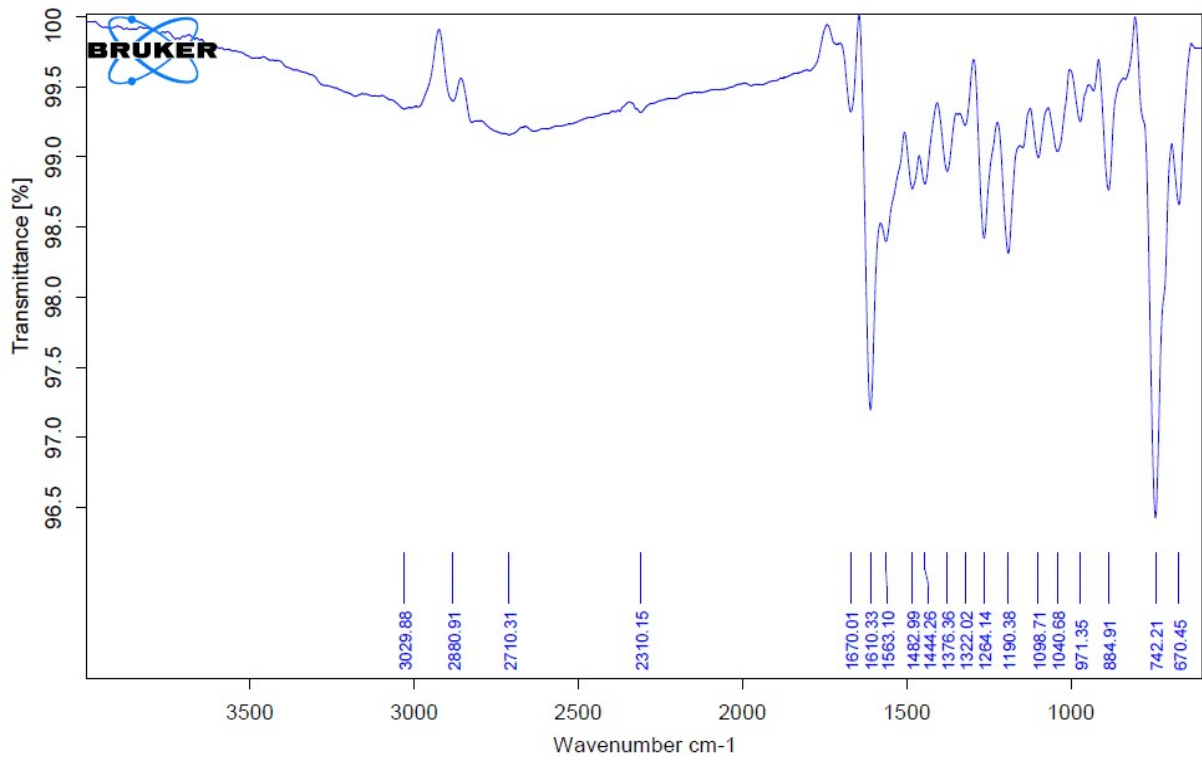

### 1H NMR of compound 5c

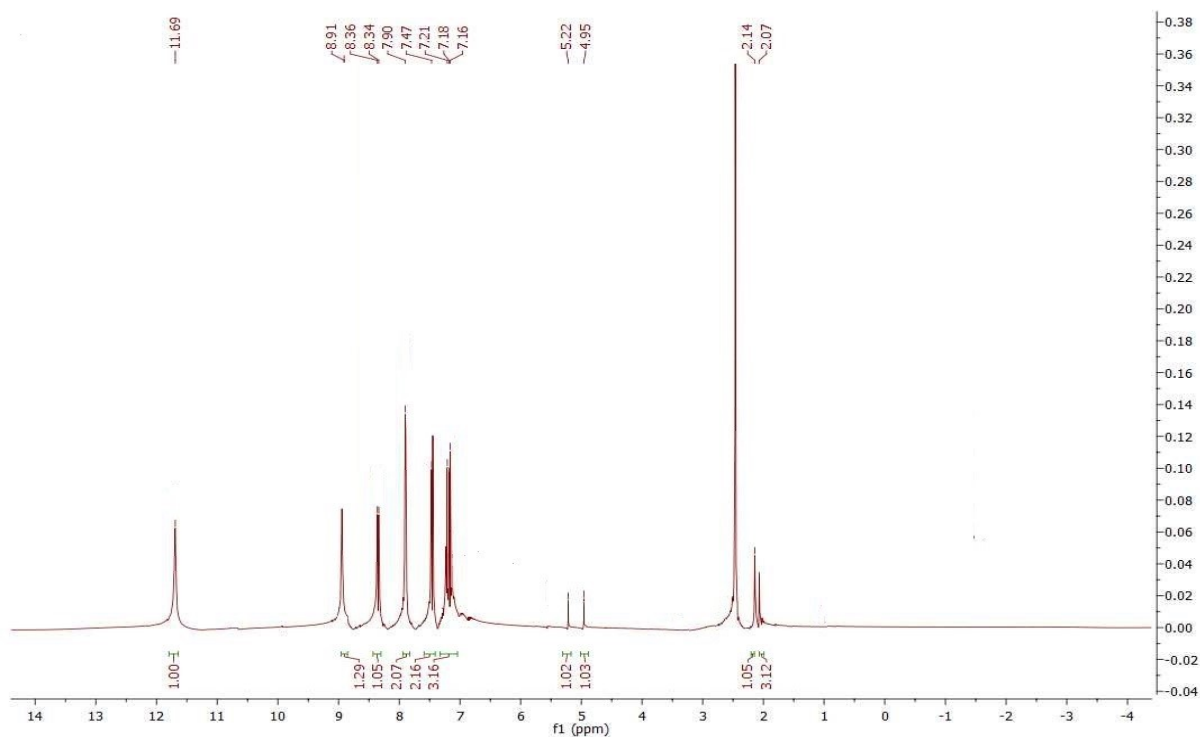

### 13C NMR of compound 5c

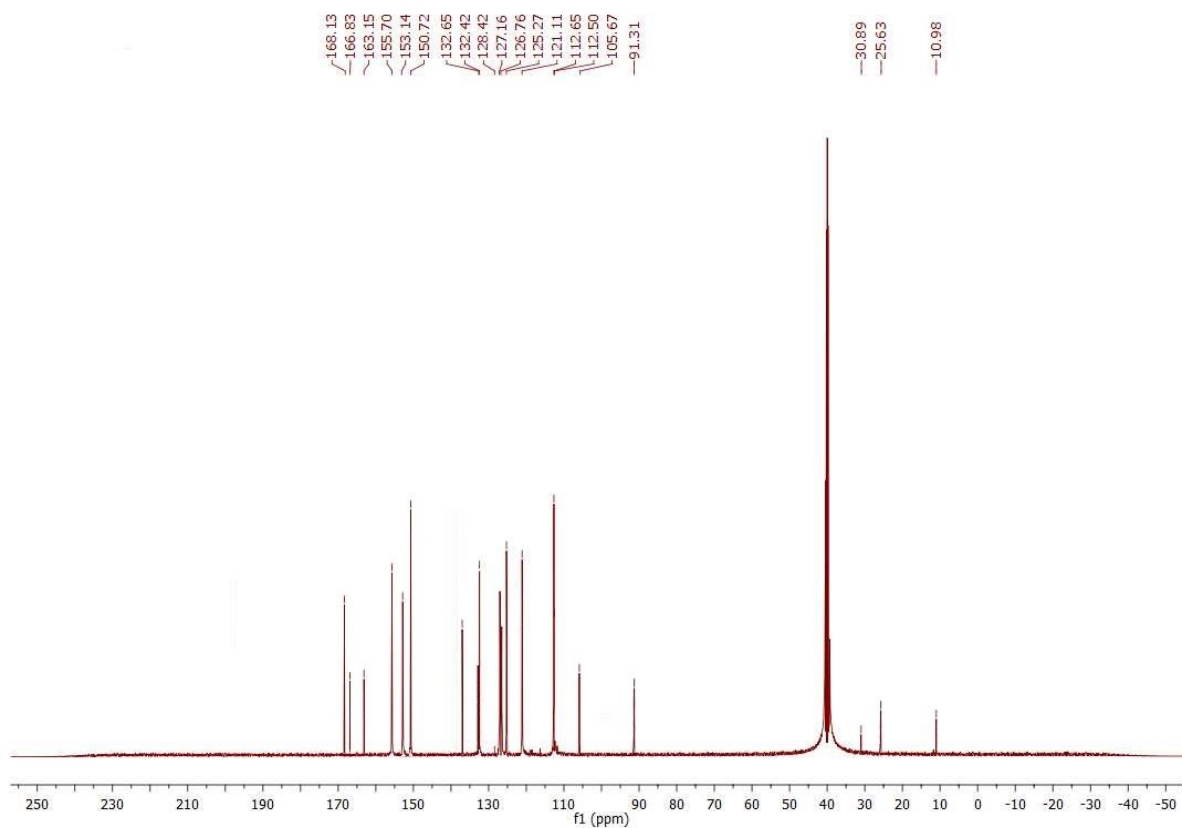

# ESI-MS of Compound 5c

WATERS,Q-TOF MICROMASS (ESI-MS)

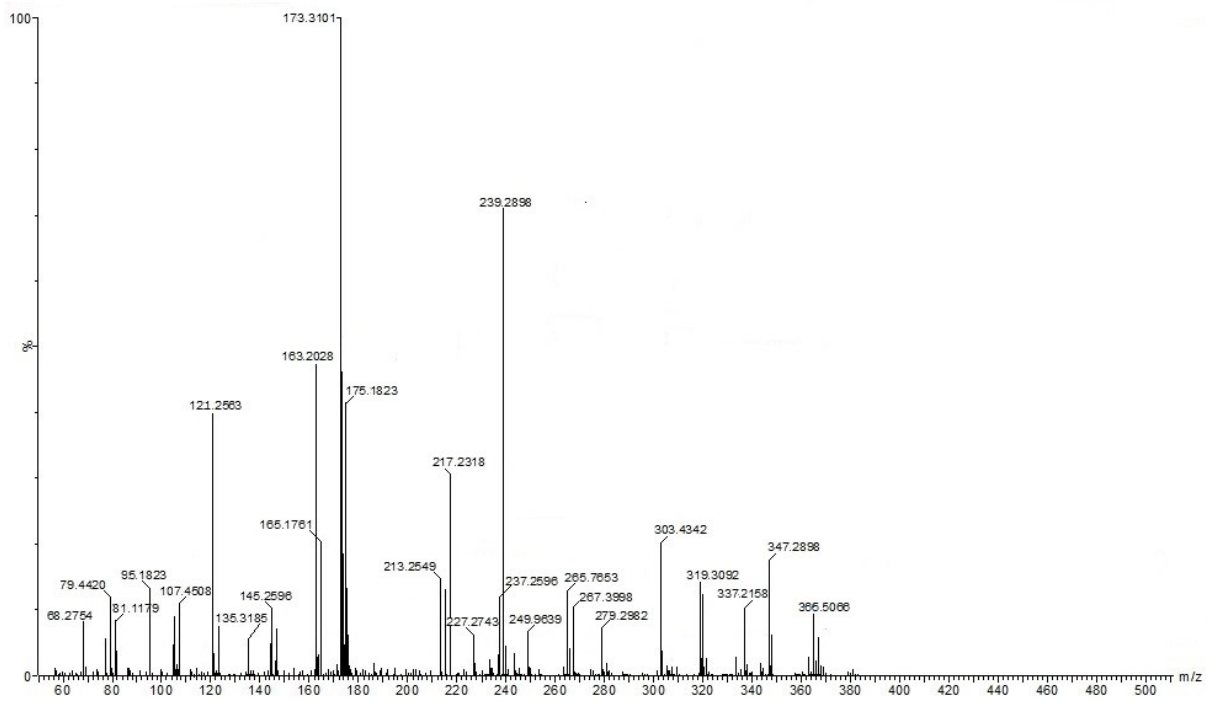

## COMPOUND 5d

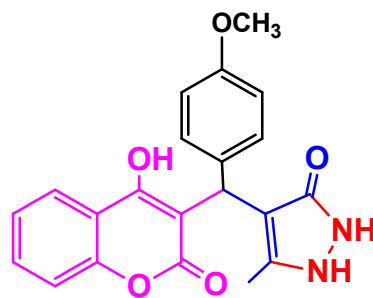



### FT-IR of compound 5d

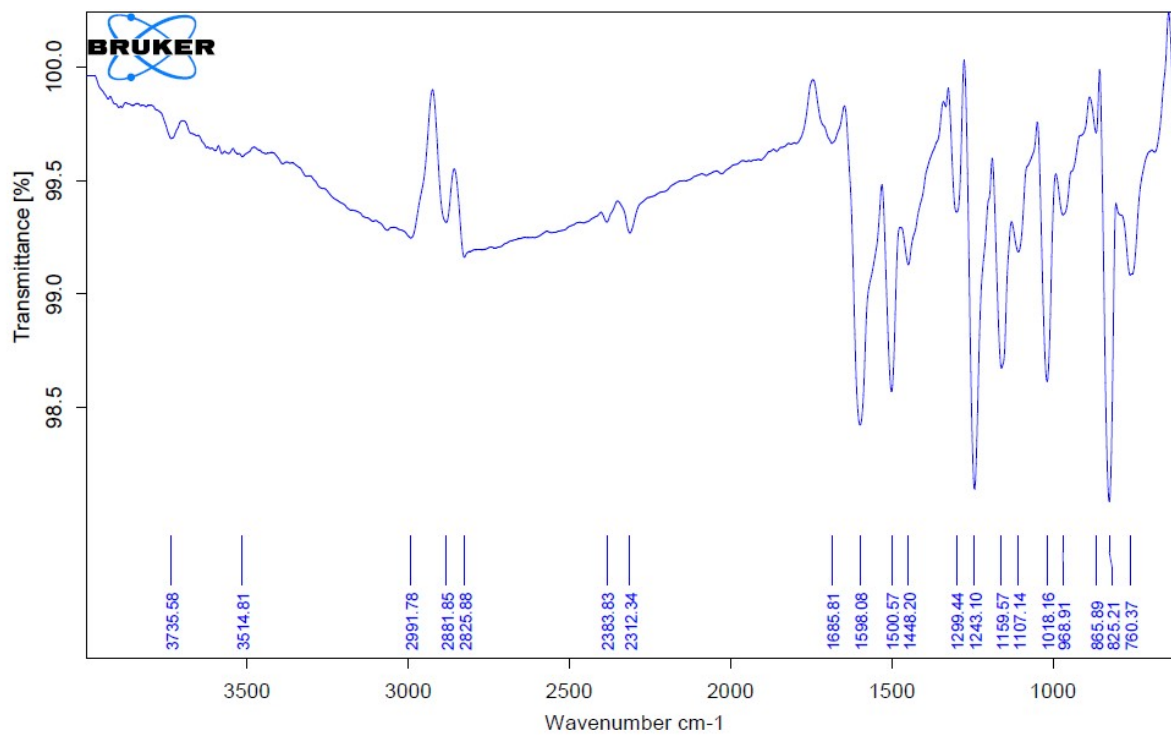

### <sup>1</sup>H NMR of compound 5d

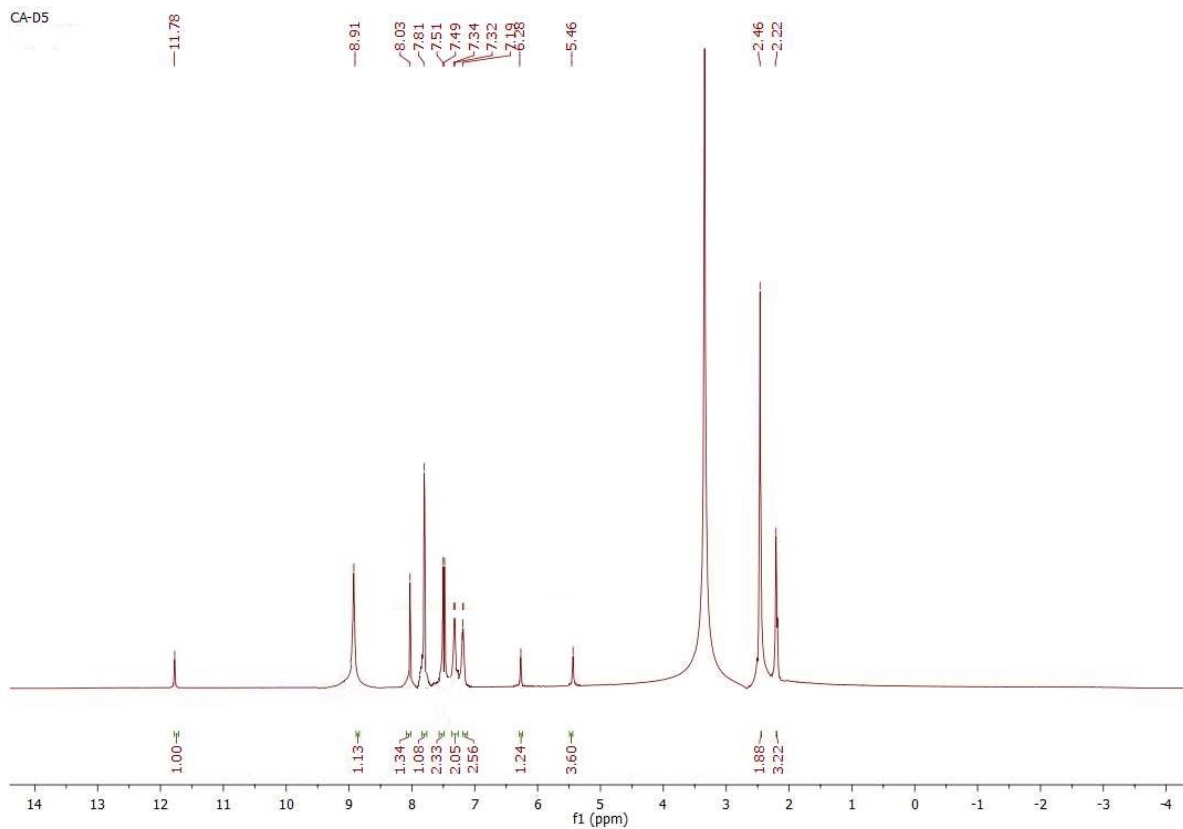

## **<sup>13</sup>C NMR of compound 5d**

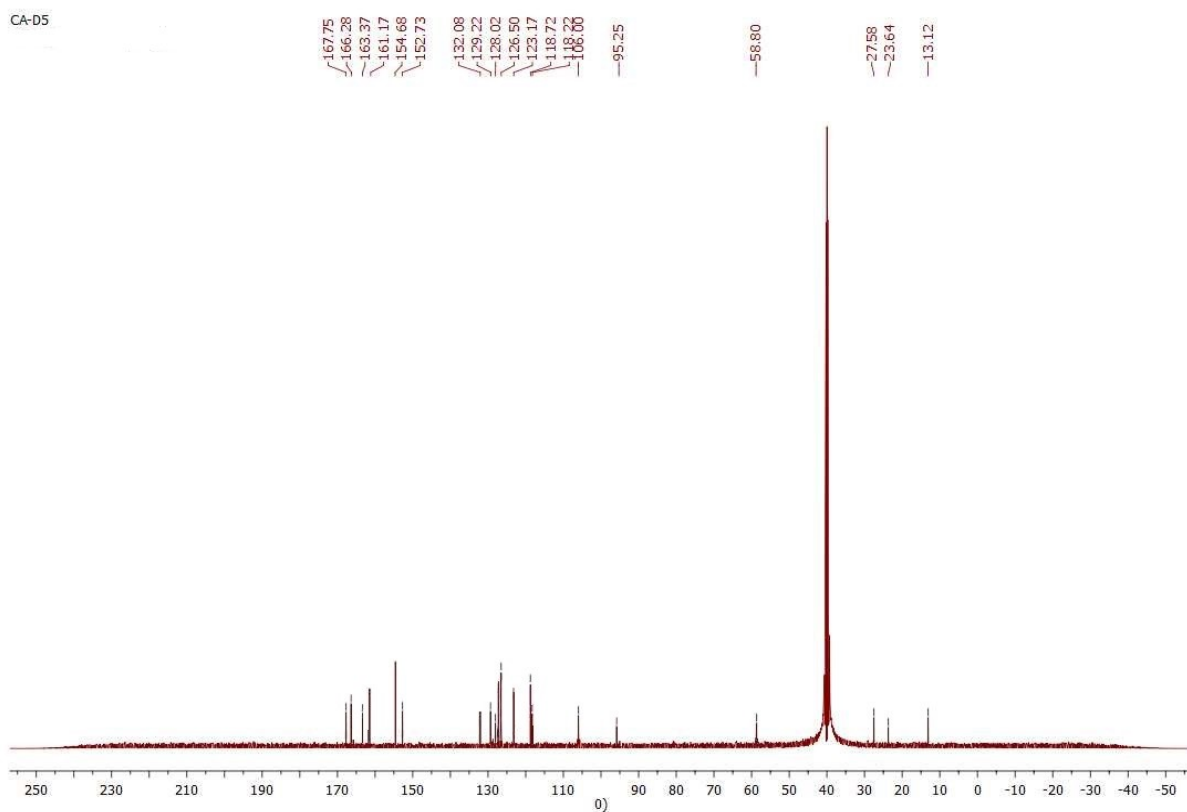

## **ESI-MS of Compound 5d**

WATERS,Q-TOF MICROMASS (ESI-MS)

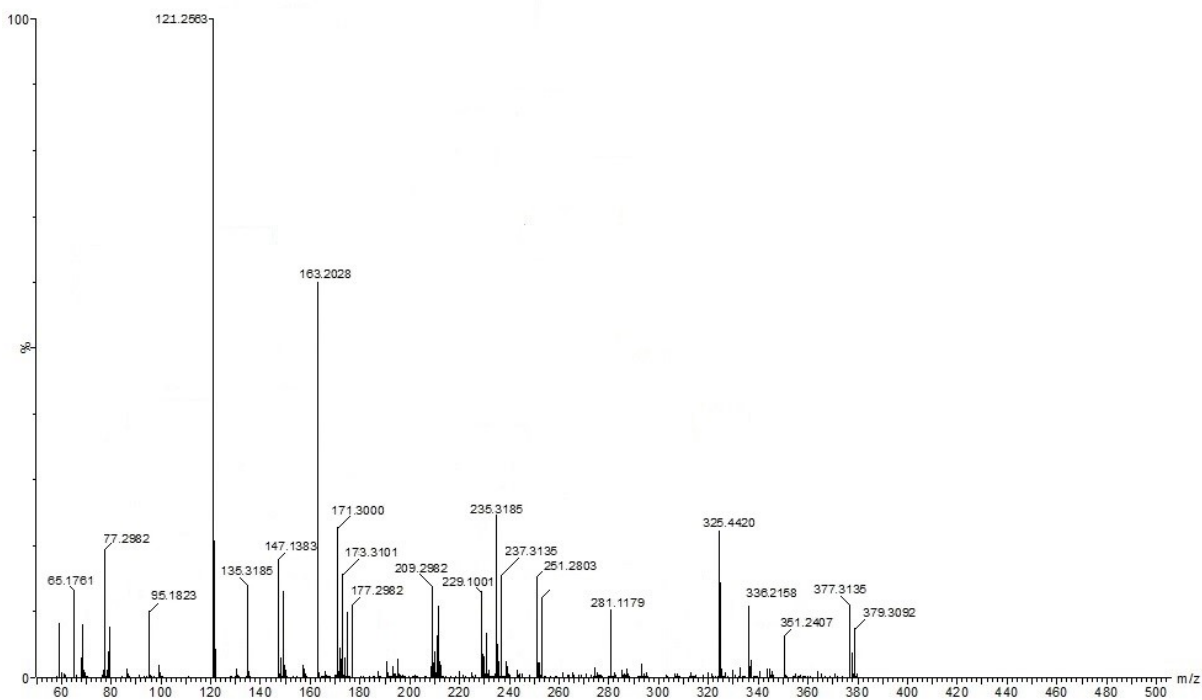

## Compound 5e

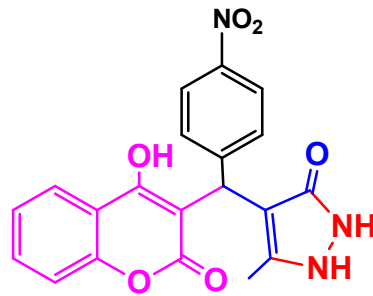

## FT-IR of compound 5e

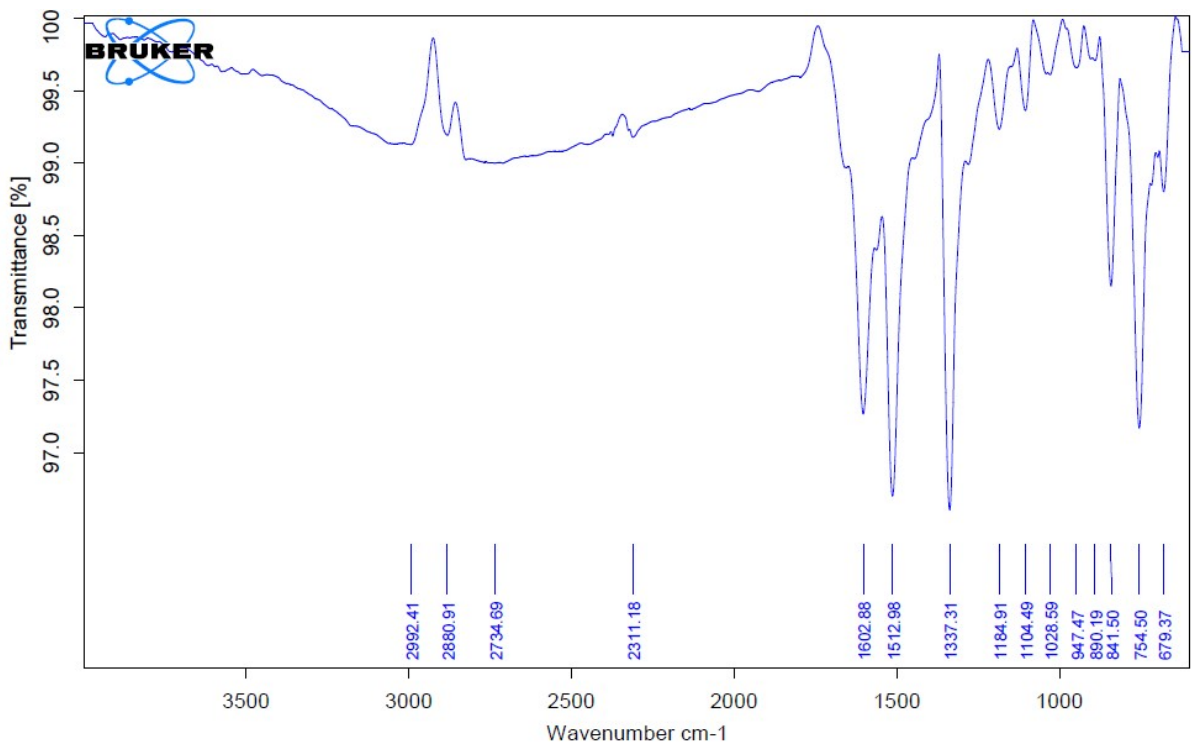

## 1H NMR of Compound 5e

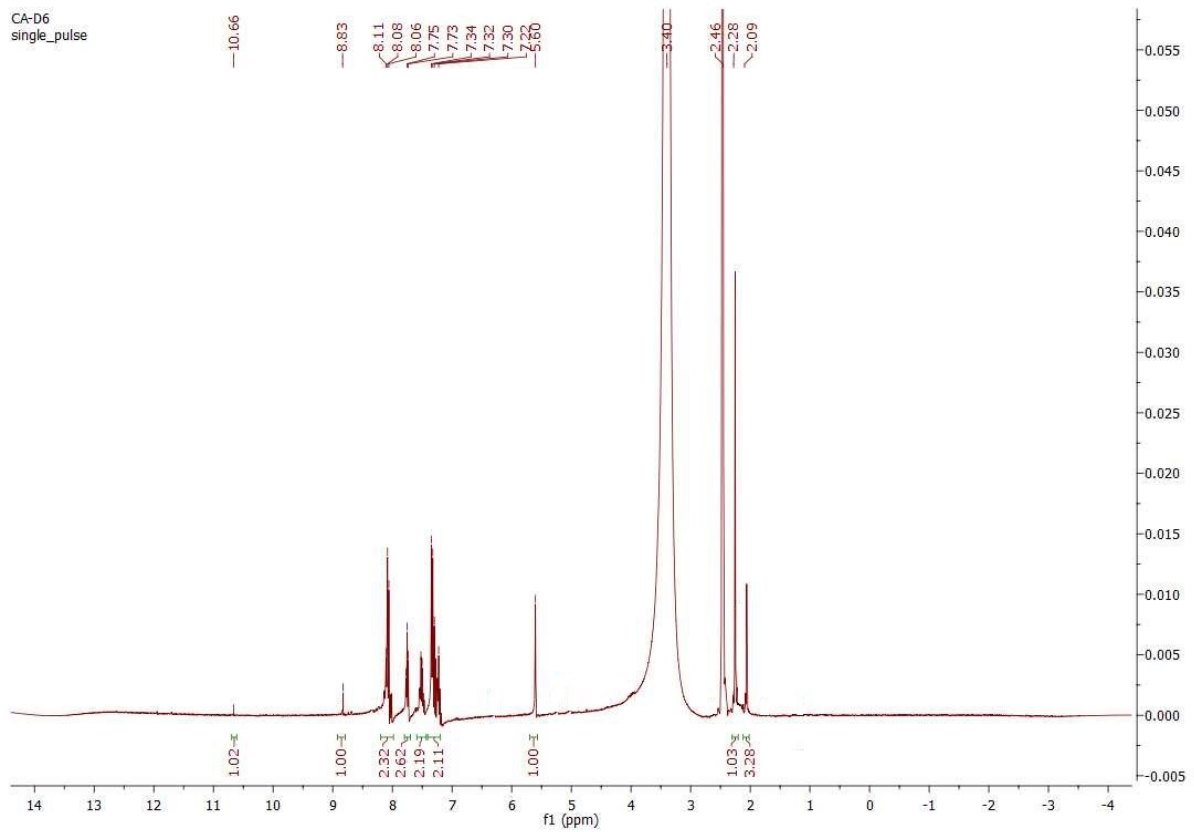

## 13C NMR of Compound 5e

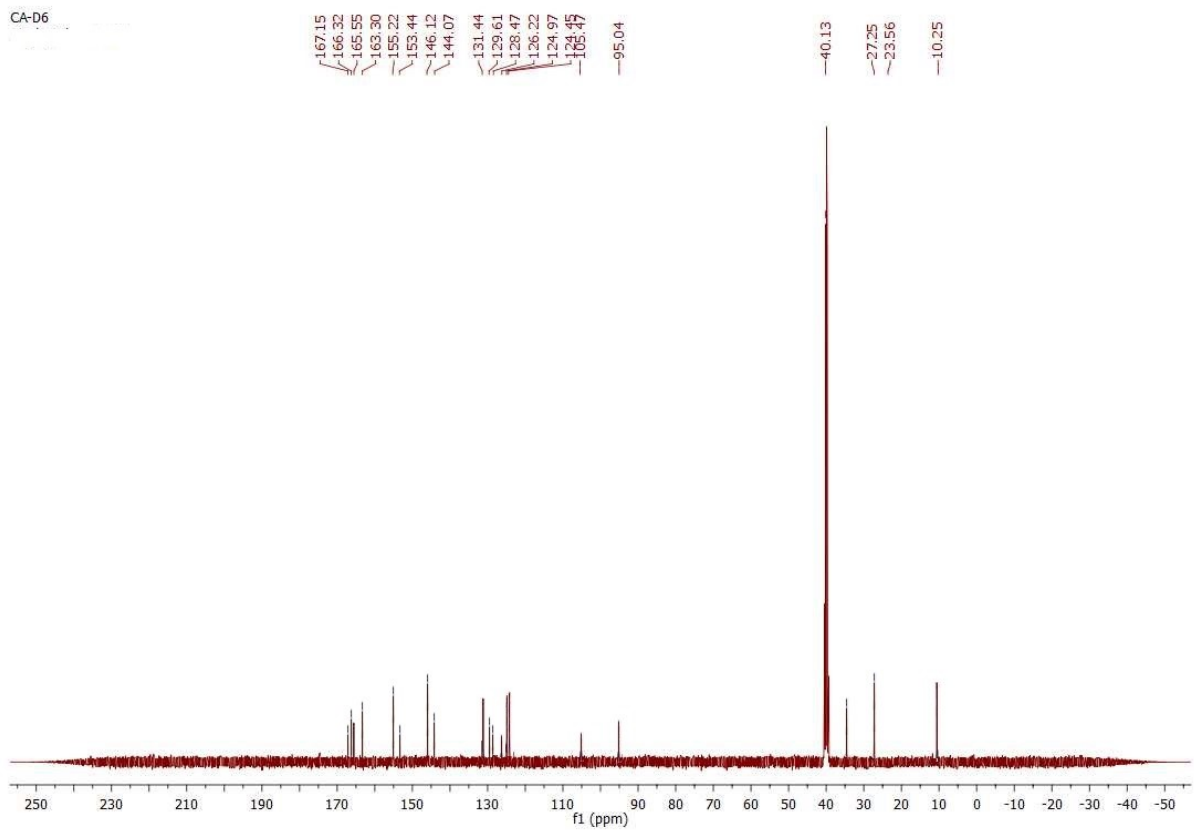

## ESI-MS of Compound 5e

WATERS,Q-TOF MICROMASS (ESI-MS)

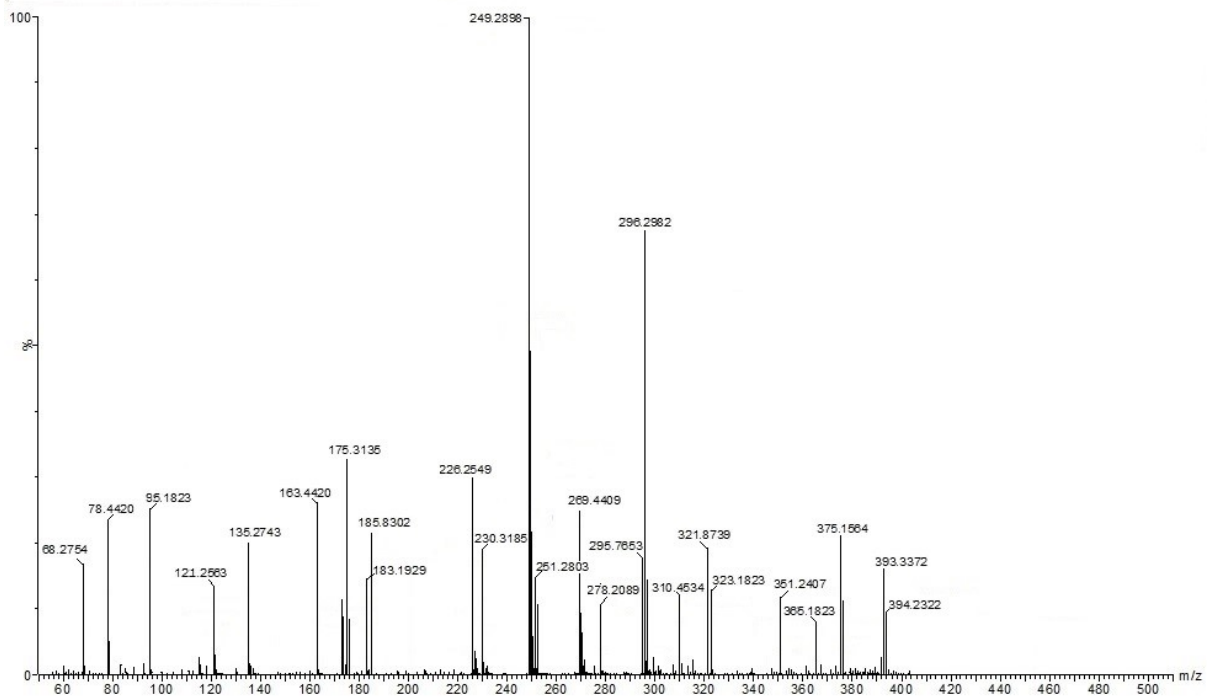

## Compound 5f

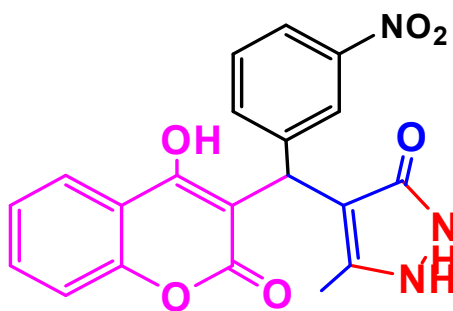

### FT-IR of Compound 5f

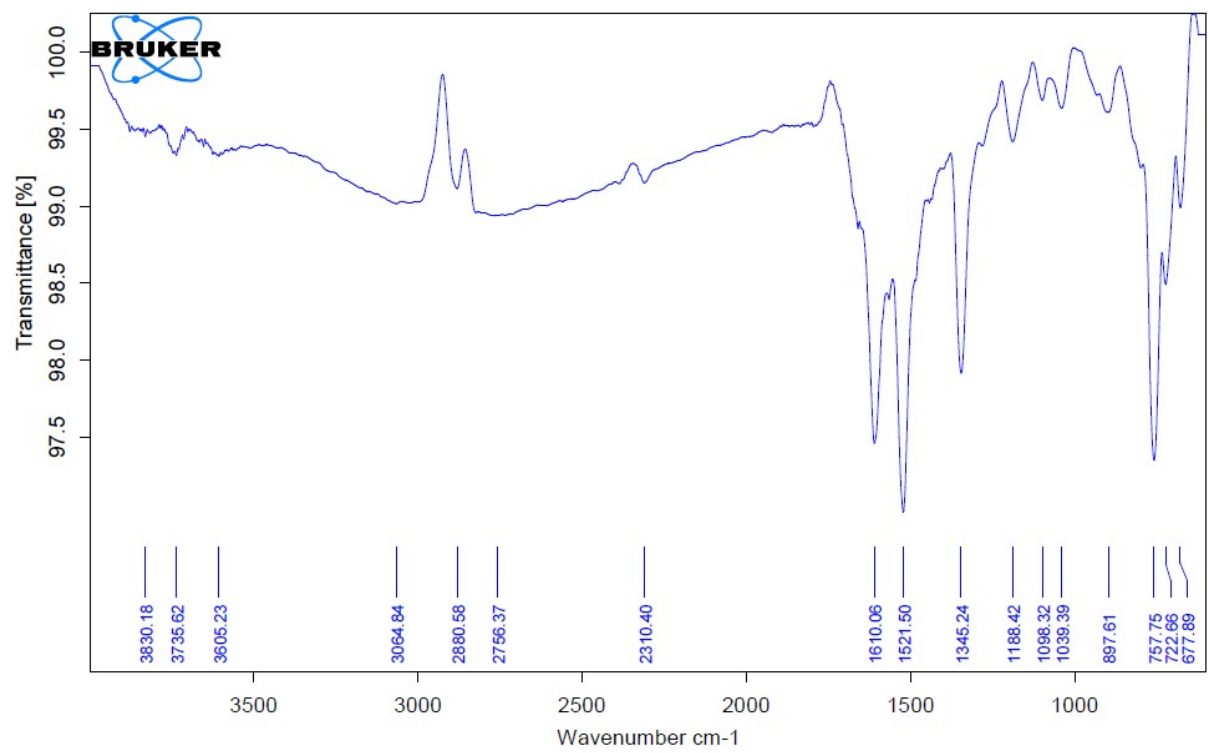

### <sup>1</sup>H NMR of Compound 5f

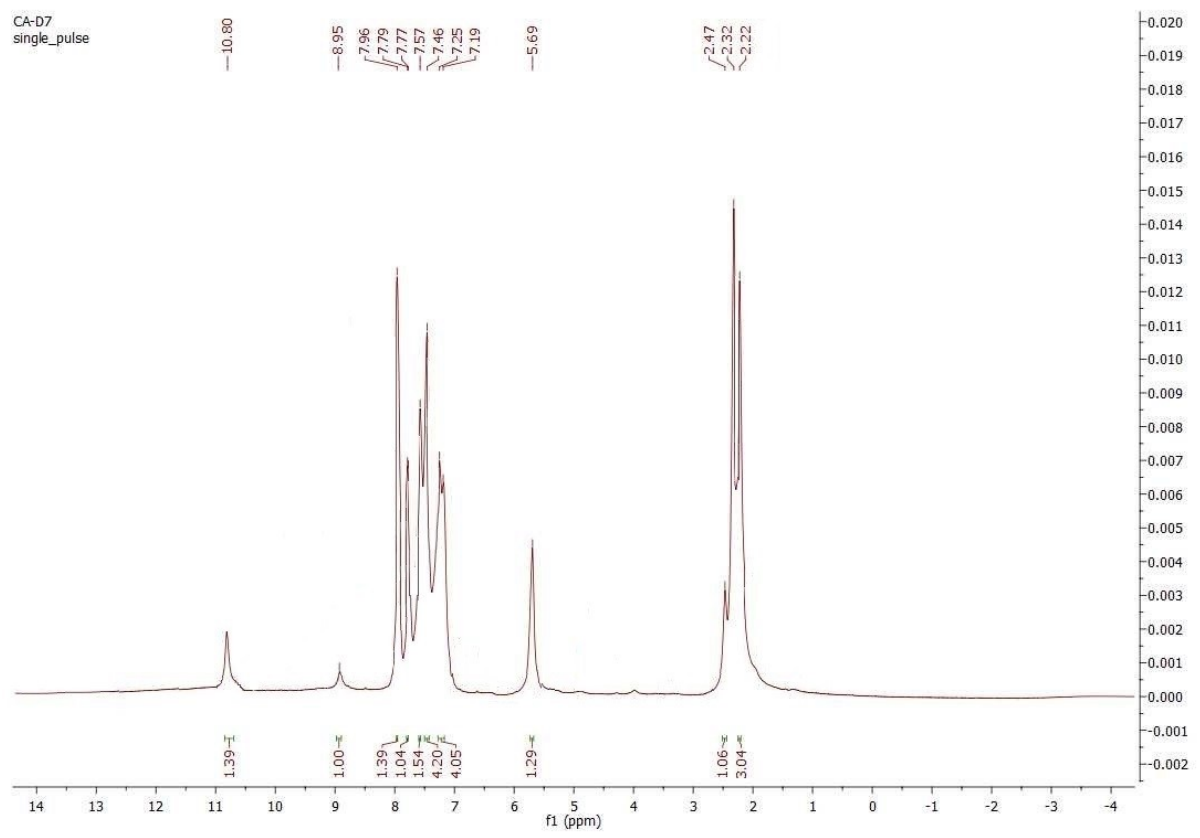

### **<sup>13</sup>C NMR of Compound 5f**

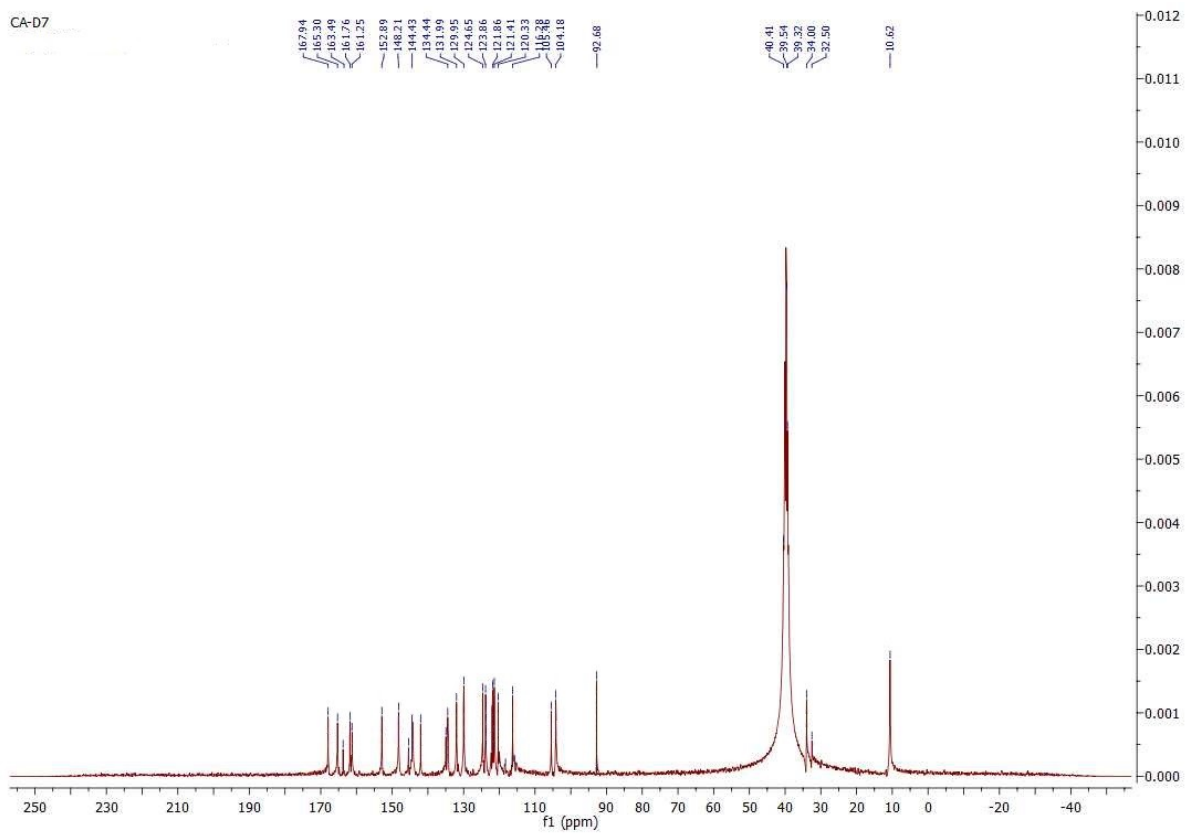

### **ESI-MS of Compound 5f**

WATERS,Q-TOF MICROMASS (ESI-MS)

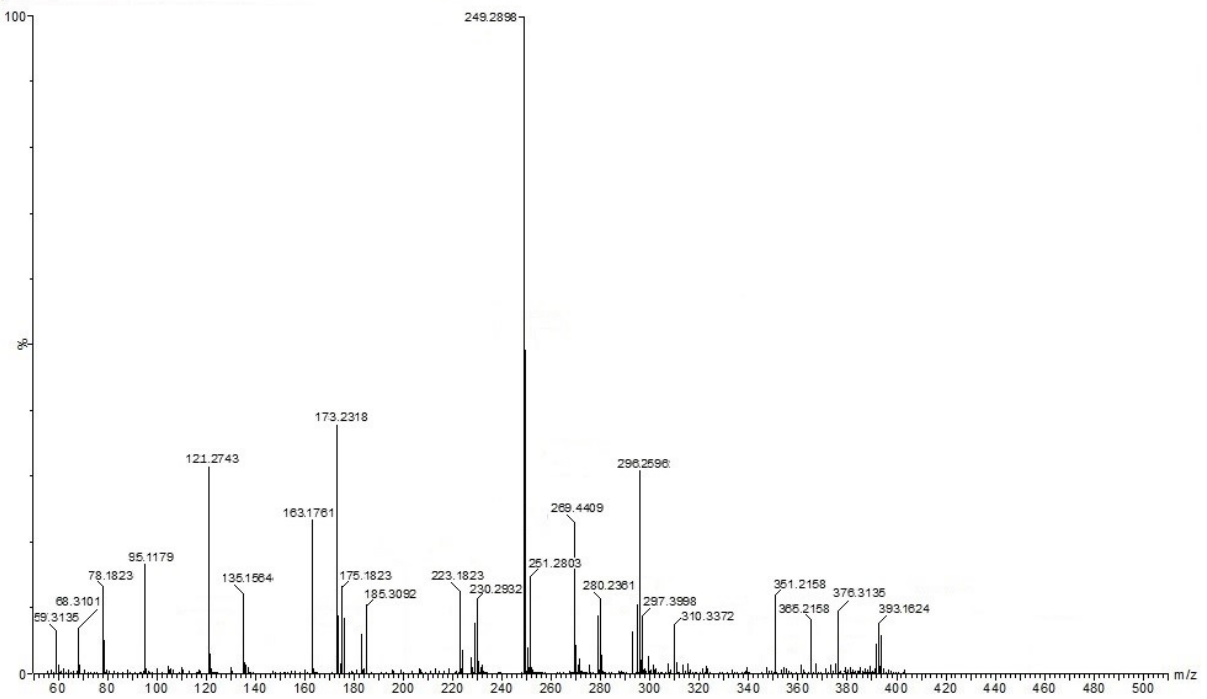

## COMPOUND 5i

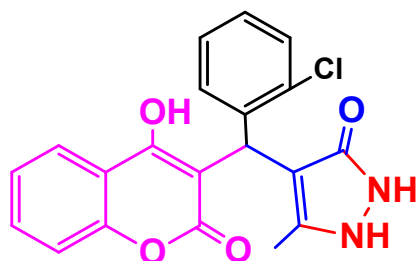

## FT-IR of compound 5i

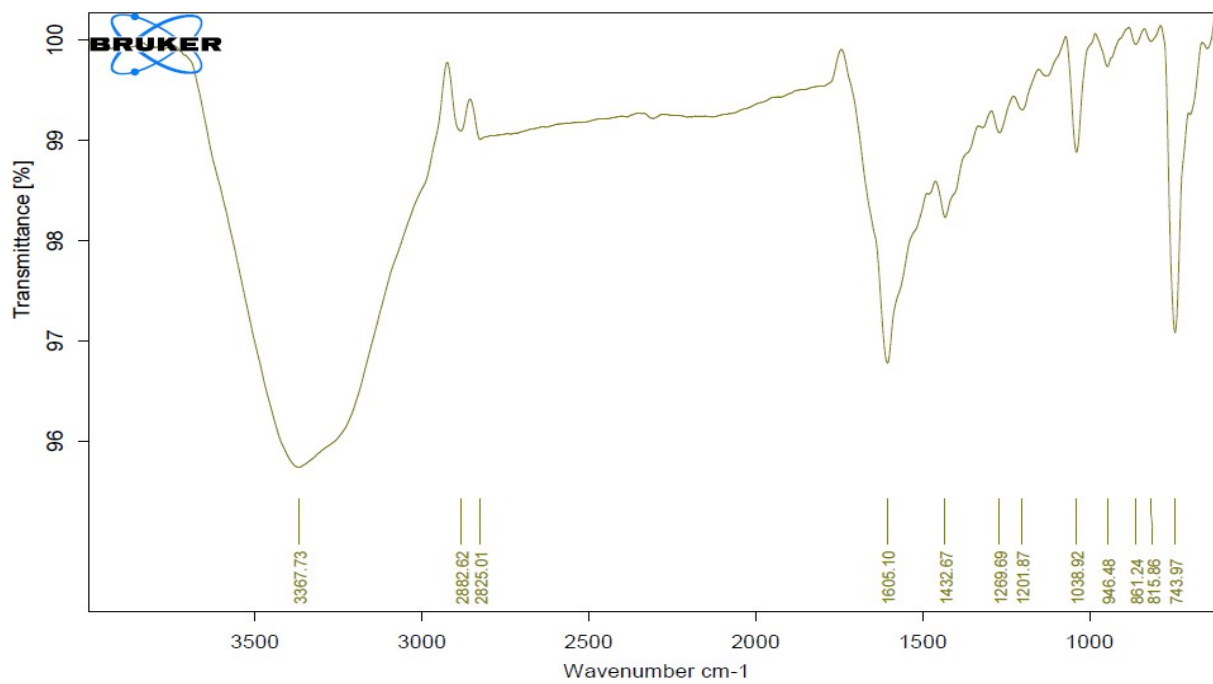



### 1H NMR of Compound 5i

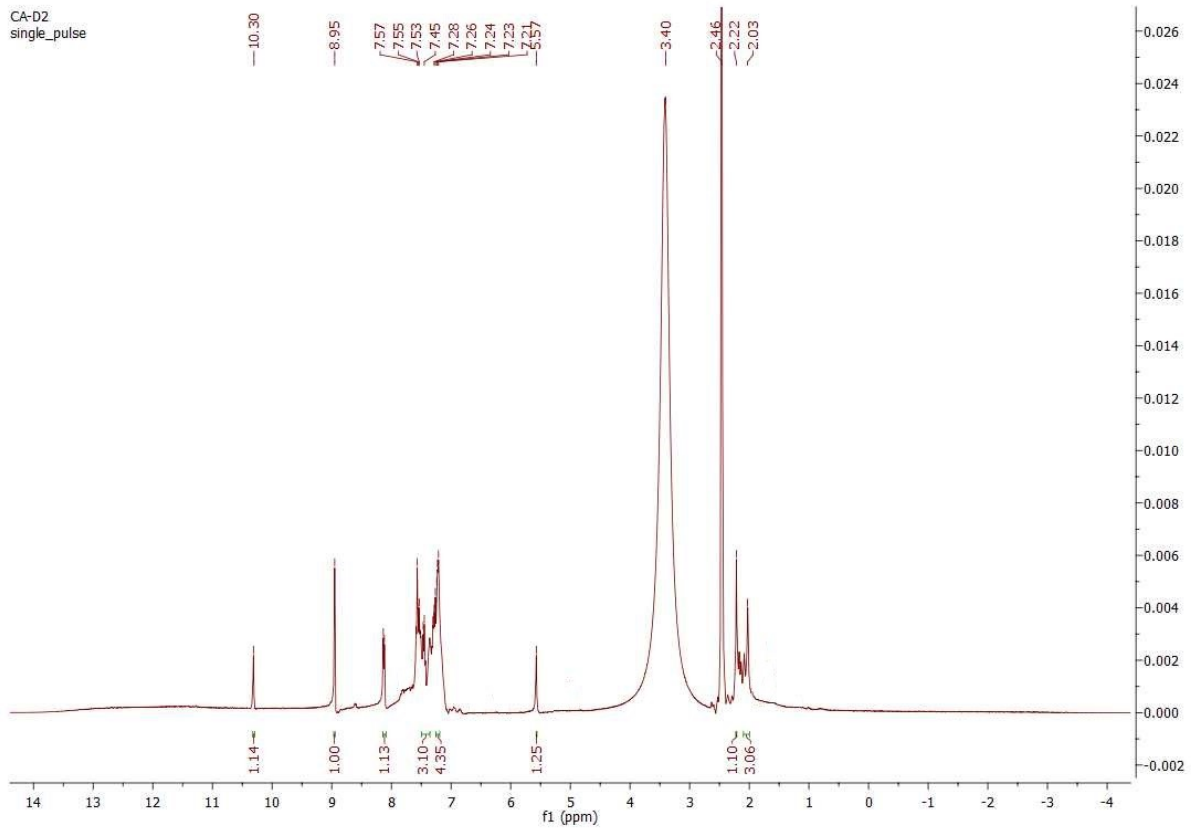

### 13C NMR of Compound 5i

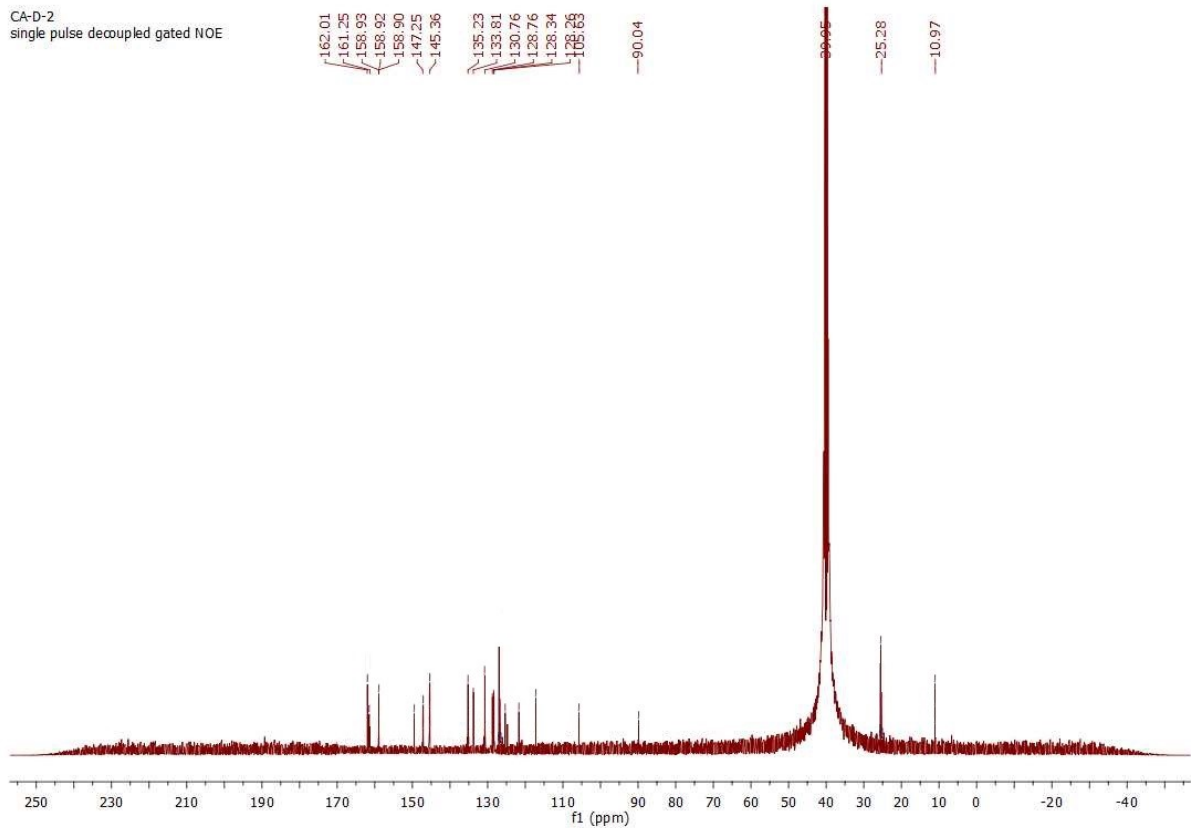

# ESI-MS of Compound 5i

WATERS,Q-TOF MICROMASS (ESI-MS)

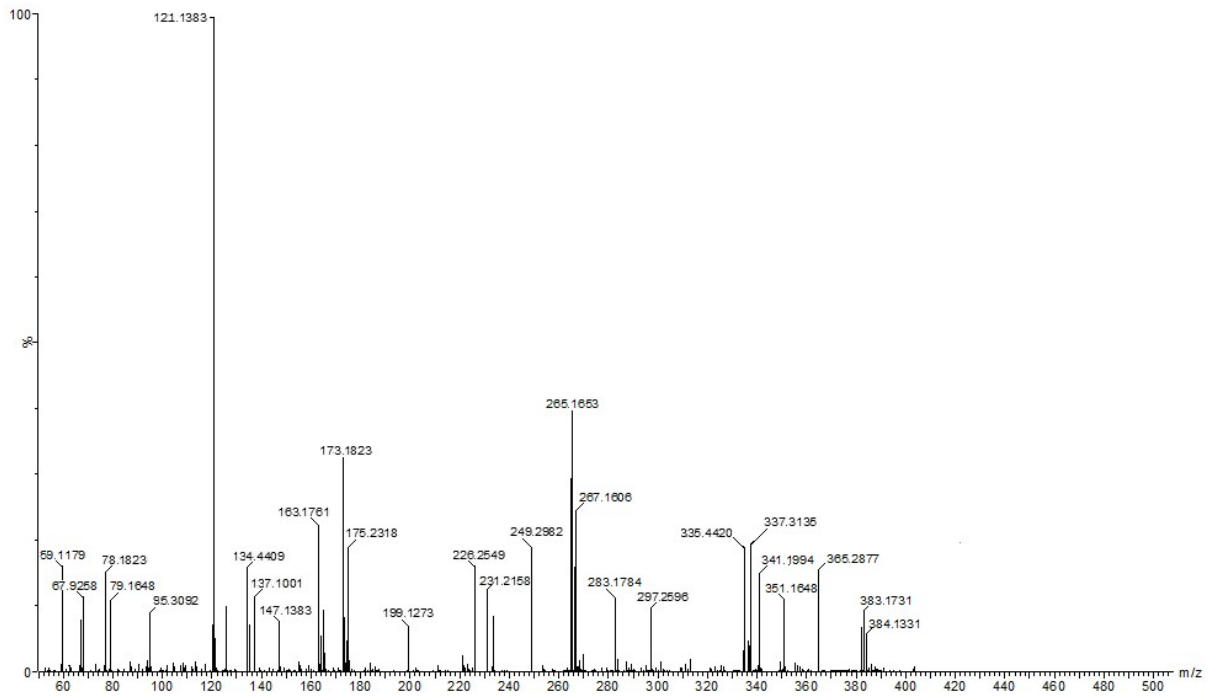

# COMPOUND 5j

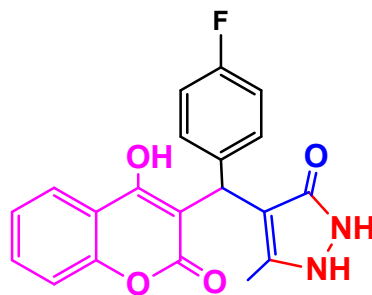

### FT-IR of compound 5j

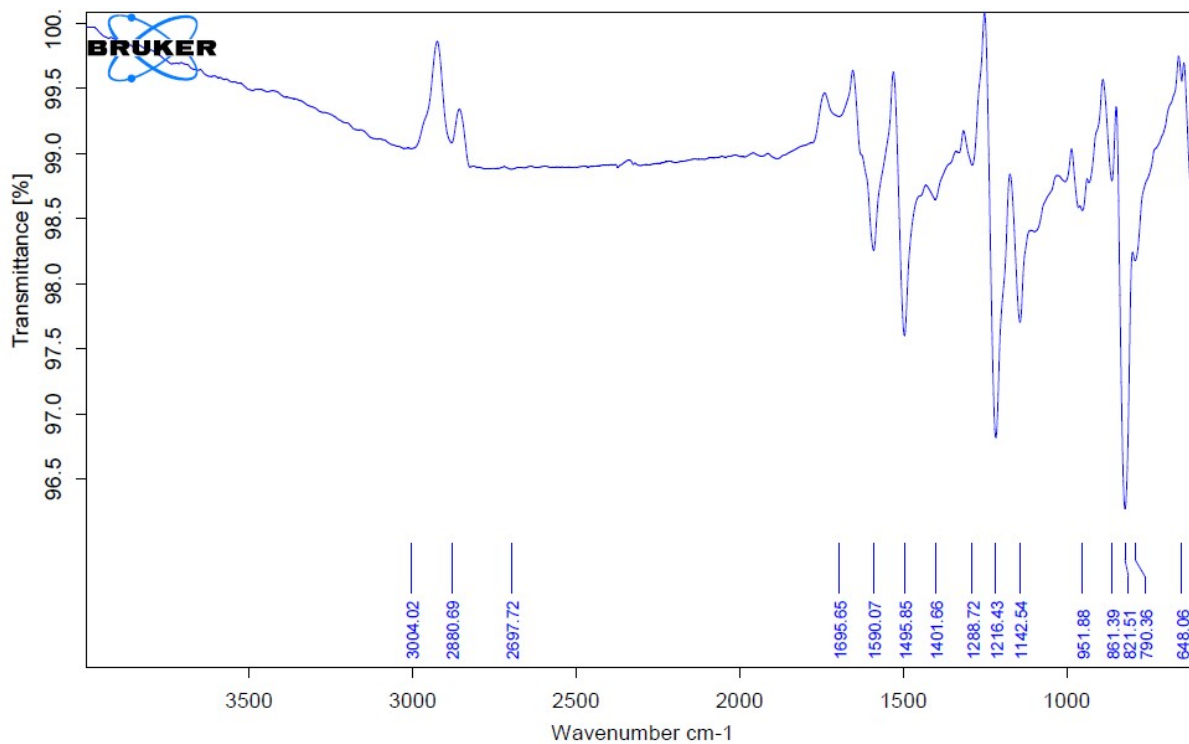

### <sup>1</sup>H NMR of Compound 5j

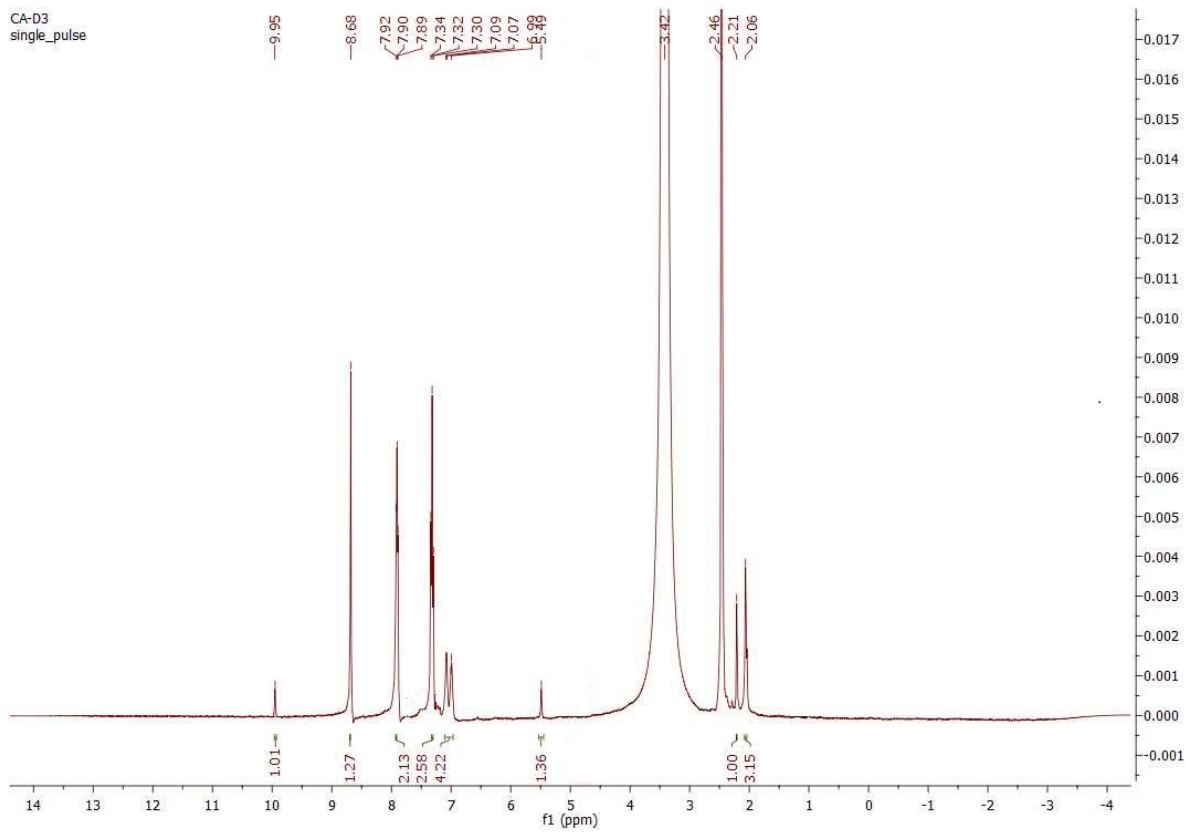

## 13C NMR of Compound 5j

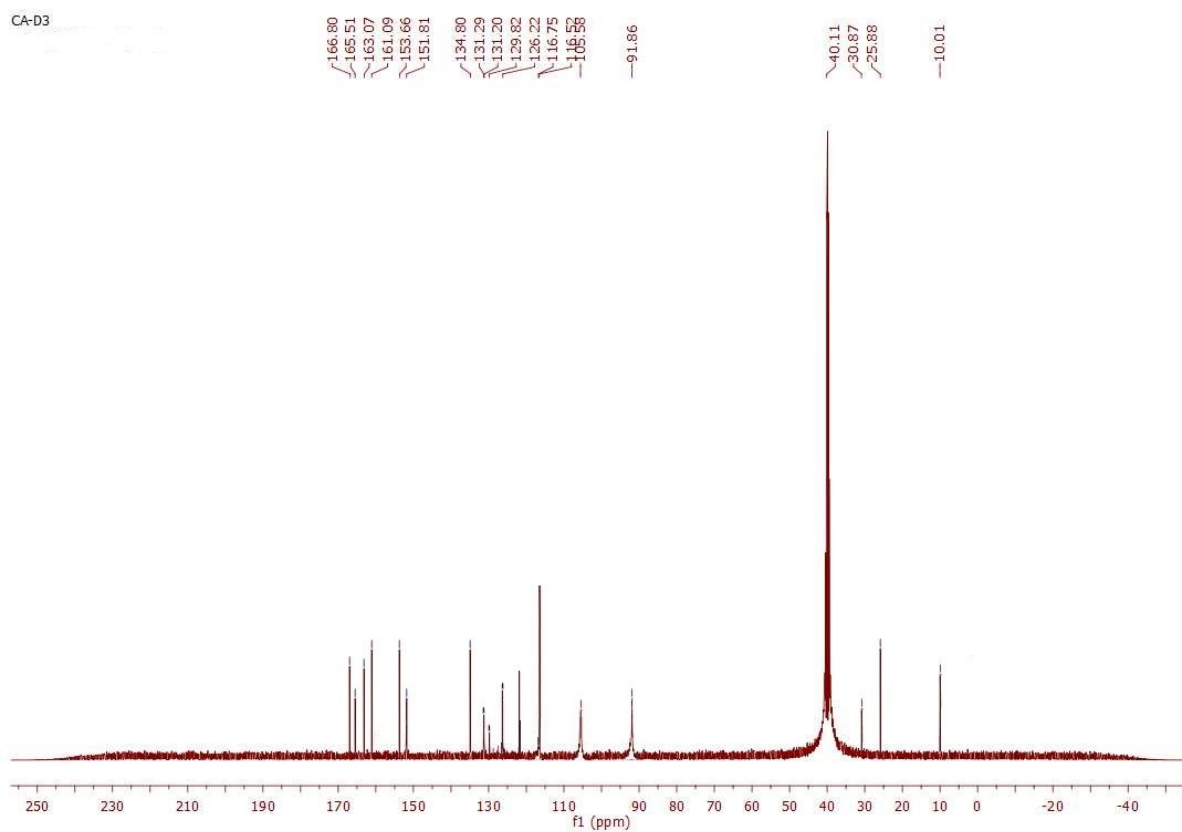

## ESI-MS of Compound 5j

WATER S,Q-TOF MICROMASS (ESI-MS)

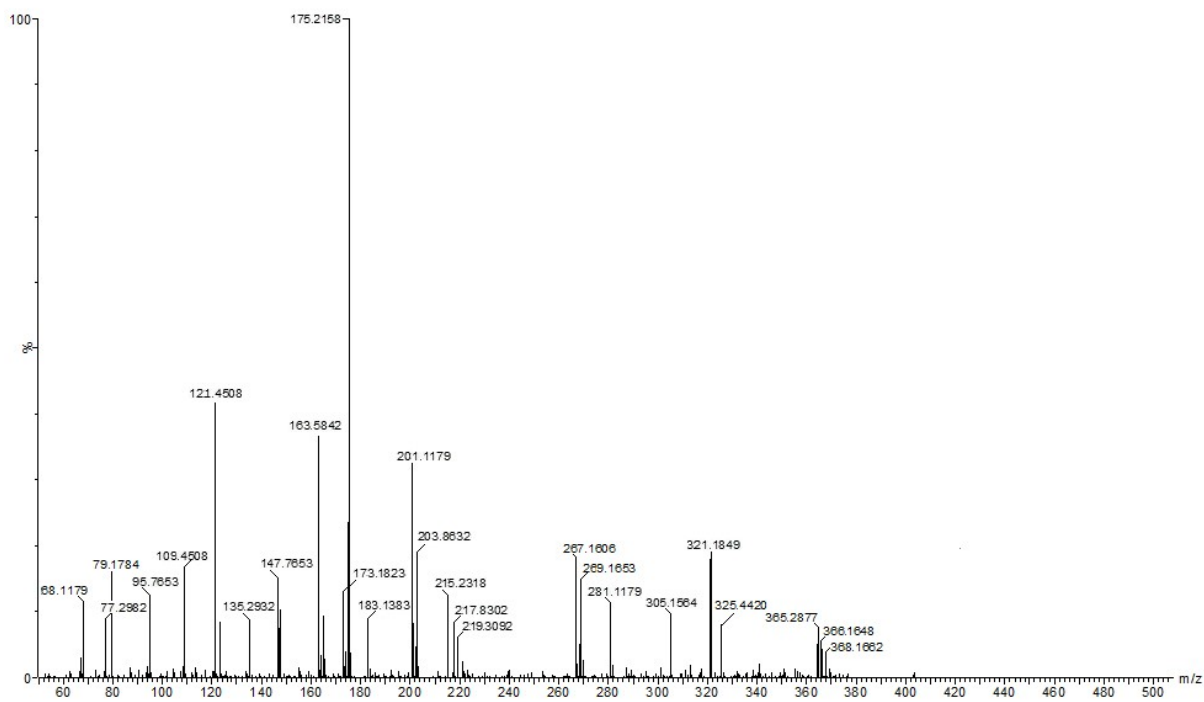

# COMPOUND 5k

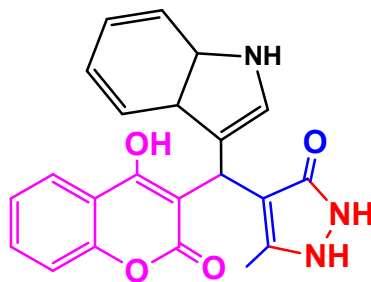

## FT-IR of Compound 5k

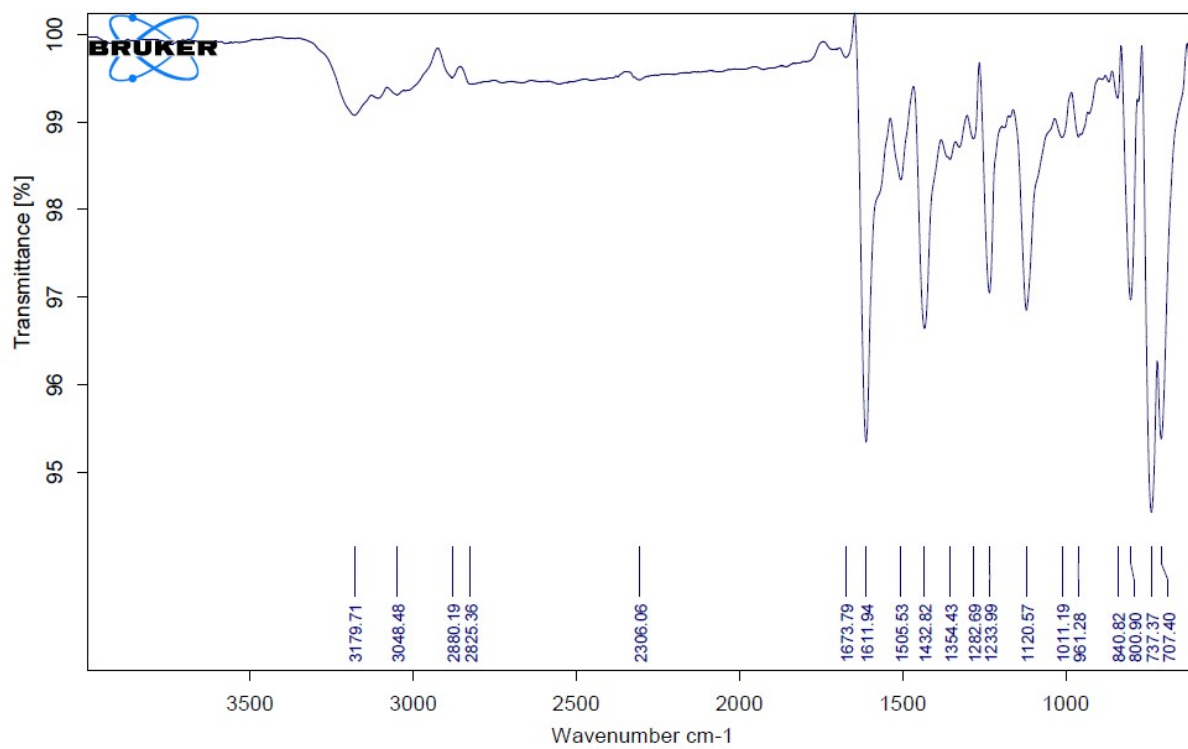

# 1H NMR of Compound 5k

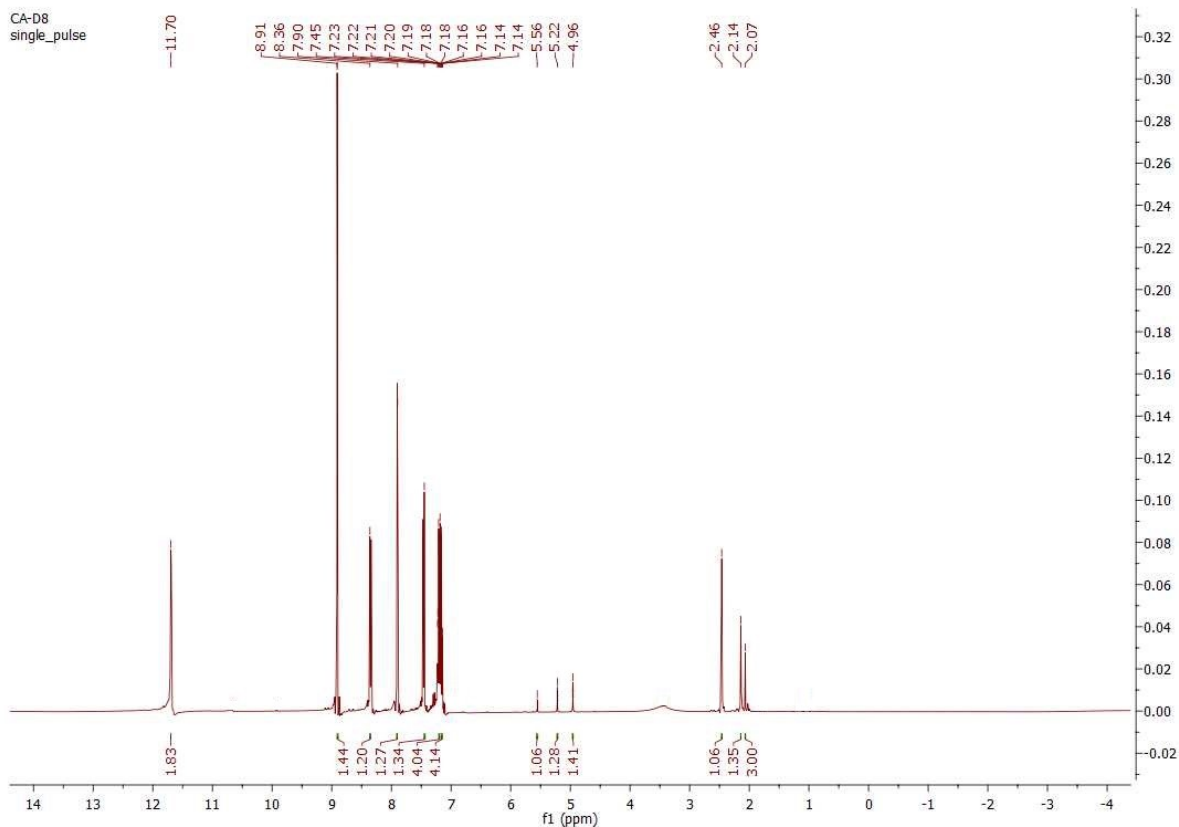

# 13C NMR of Compound 5k

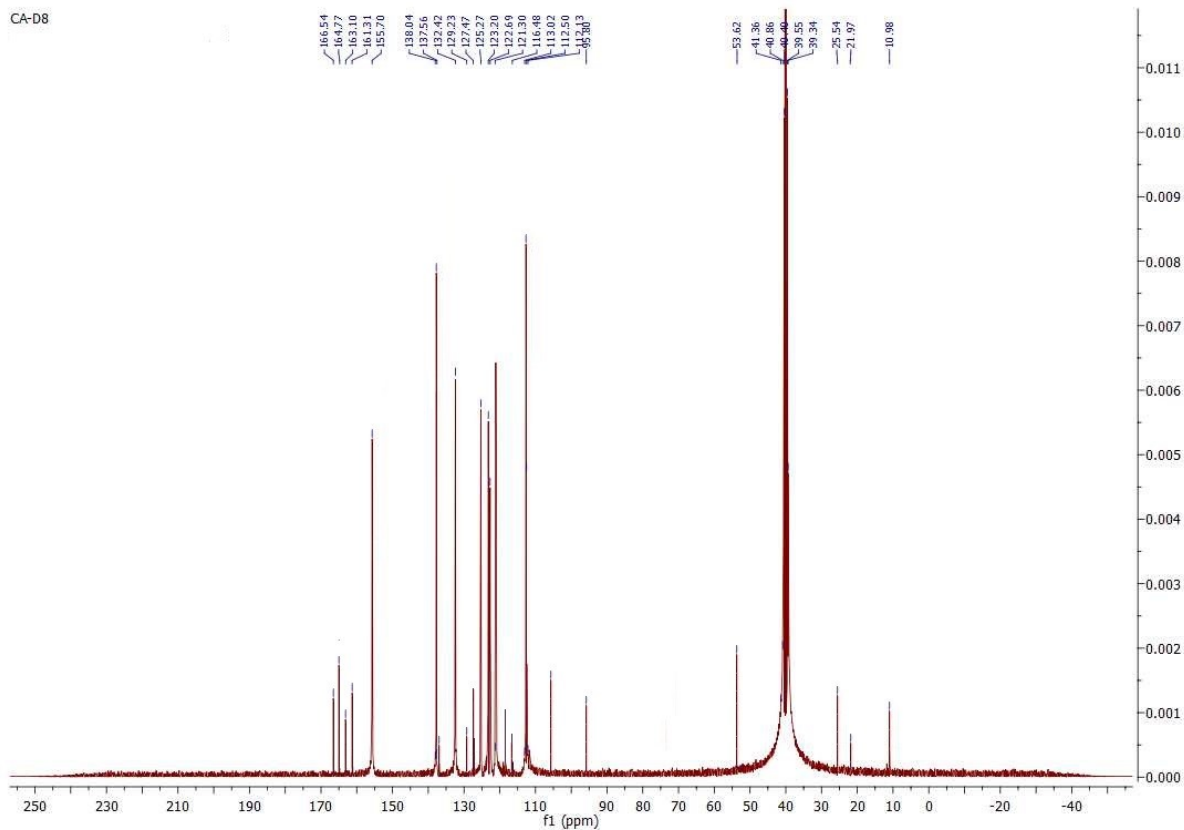

# ESI-MS of Compound 5k

WATERS,Q-TOF MICROMASS (ESI-MS)

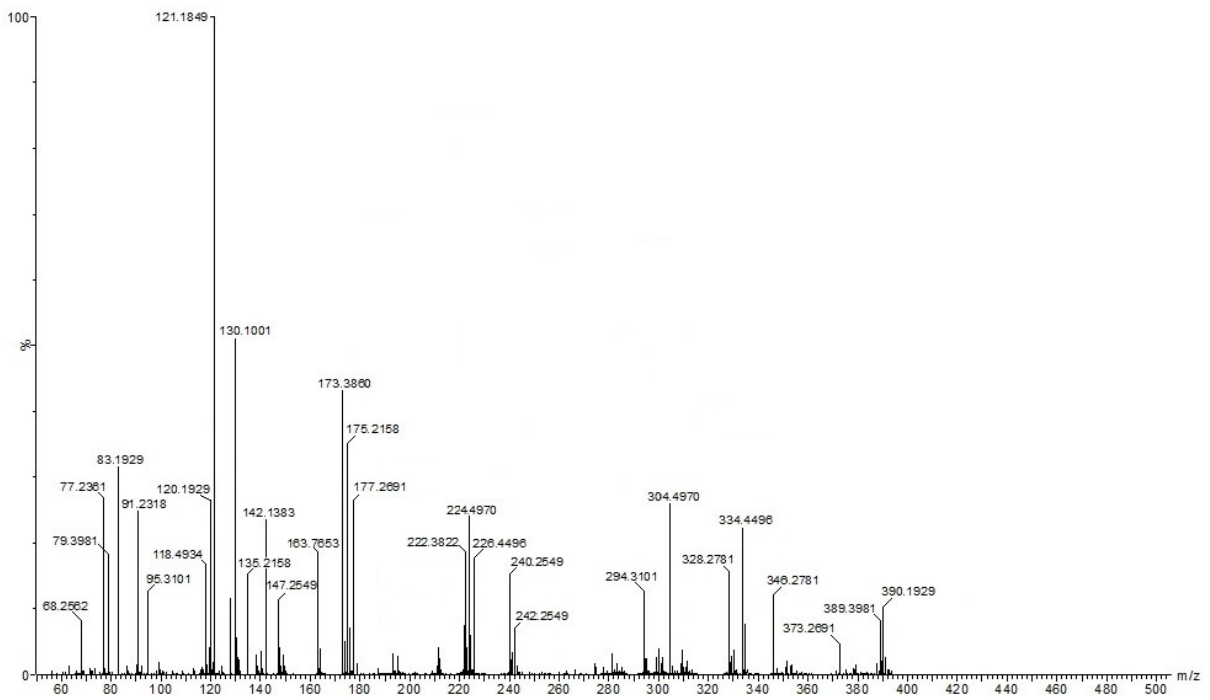

Supplement: d3ra00869j1.pdf [file d3ra00869j1.pdf]
